# Supplementary material
Source: HighWire-hosted journal article supplement (https://cmajopen.ca/highwire/filestream/89554/field_highwire_adjunct_files/1/open-2022-0022-original-submission.pdf)
Supplement: open-2022-0022-original-submission.pdf [file open-2022-0022-original-submission.pdf]

## Introduction

Long-term care facilities provide housing, support and nursing care to frail elders no longer able to function independently. Due to the nature of care provided, and the close contact between staff and residents, these facilities are at higher risk for the spread of infections. (1) During the early months of the coronavirus disease 2019 (COVID-19) pandemic of 2020, long-term care facilities proved to be sites of major outbreaks in British Columbia (2) and across Canada (3, 4). The impact on long-term care facilities and their residents highlighted the need to better understand the risk factors for COVID-19 outbreaks in this setting.

Long-term care facilities in British Columbia are publicly funded except for a small number of private pay facilities in larger cities. There are five regional health authorities in British Columbia that deliver the province's publicly funded health services. Of these publicly funded facilities, approximately one third are owned and operated by the provincial health authorities (publicly-owned). The remaining facilities are owned and operated by independent (non-government) non-profit societies or for-profit owned corporations. In addition to ownership differences between facilities, there is also substantial variation in staffing levels (5) and staff mix, human resources practices (sub-contracting the workforce and/or services) (6, 7), facility characteristics (number of beds, number of rooms with shared beds, facility age) (8), and resident case mix distribution (8).

Past research has demonstrated that differences among long-term care facilities should be considered when examining health outcomes. (9) Research from the US found a number of facility characteristics to be predictive of COVID-19 outbreaks, including for-profit ownership (10), lower total nurse staffing and registered nurse staffing levels (11), and larger facility size (11, 12). One study set in Ontario, Canada, reported that facility size and older design standards

1  
2  
3 but not ownership were associated with odds of an outbreak, although for-profit ownership was  
4 associated with the extent of outbreaks and death rates when compared to non-profit societies  
5 and municipal government-owned facilities. (13) However, that study did not include staffing  
6 data - an important potential confounder when examining ownership due to the association of  
7 for-profit ownership with both lower staffing levels (14) and greater risk of COVID-19 infection  
8 (10). Aside from the Ontario study, there has been little published Canadian research on this  
9 topic. Our study aimed to assess whether facility ownership and staffing characteristics (staffing  
10 levels and sub-contracting out practices) were associated with COVID-19 facility outbreaks  
11 among publicly funded long-term care facilities, after controlling for other factors.  
12  
13  
14  
15  
16  
17  
18  
19  
20  
21  
22  
23

## 24 **Methods**

### 25 **Setting and Study Design**

26  
27 This retrospective observational study included all COVID-19 outbreaks in long-term  
28 care facilities in British Columbia, during the first and second waves of the pandemic between  
29 March 1, 2020 and January 31, 2021. The study included all publicly funded long-term care  
30 homes in the five health regions in British Columbia. It excluded assisted living facilities,  
31 supportive housing, group homes, palliative and hospice homes, acute care facilities, and private  
32 pay-facilities. Facilities with less than five beds (n=3) were also excluded since publicly  
33 available COVID-19 outbreak data was not available for these facilities.  
34  
35  
36  
37  
38  
39  
40  
41  
42  
43  
44

### 45 **Data sources**

46  
47 Long-term care facility data were obtained from the Office of the Seniors Advocate BC  
48 Long-Term Care Facilities Quick Facts Directory 2019/2020 (8), a publicly available data source  
49 containing information from the Ministry of Health, health authorities, the Canadian Institute for  
50 Health, the British Columbia Centre for Disease Control, and the facilities themselves. Outbreak  
51  
52  
53  
54  
55  
56  
57  
58  
59  
60

1  
2  
3 data and community prevalence data were obtained from publicly available British Columbia  
4  
5 Centre for Disease Control data: Weekly COVID-19 Outbreak Reports for Long-Term Care,  
6  
7 Assisted Living and Independent Living Facilities (15); and the COVID-19 Dashboard Case  
8  
9 Details database (16). COVID-19 cases included in the study were identified according to the  
10  
11 British Columbia Centre for Disease Control case definitions. (17) Daily community incidence  
12  
13 for each of British Columbia's five health authorities was computed using the British Columbia  
14  
15 Centre for Disease Control case data (16) for each day of the study period (March 1, 2020 to  
16  
17 January 31, 2021) and health authority population counts from Statistics Canada (18). A decision  
18  
19 to end the study on January 31, 2021 was made since by that time virtually all residents and a  
20  
21 high number of long-term care staff had been fully vaccinated.  
22  
23  
24  
25

### 26 **Outcome and explanatory variables**

27  
28 Our main outcome variable was occurrence of a COVID-19 outbreak. An outbreak was  
29  
30 declared when “one or more clients (residents) and/or staff of a long-term care facility was  
31  
32 identified by a laboratory-confirmed COVID-19 diagnosis.” (17) Explanatory variables of  
33  
34 interest included facility ownership (for-profit, non-profit, or health authority owned and  
35  
36 operated), staffing levels (total direct, nursing, and allied care hours per resident day), and sub-  
37  
38 contracted out services (professional and non-regulated nursing, and food services). A time-  
39  
40 varying covariate for community-level incidence of COVID-19 was created by calculating a  
41  
42 rolling 14-day incidence per 1000 population for each day, by health authority location of the  
43  
44 facility. Other covariates included facility age, size, facilities with shared beds, and the  
45  
46 proportion of rooms in shared accommodation. Covariates for facility distribution of resident  
47  
48 mean age, proportion male, and mean case mix index were also included.  
49  
50  
51  
52

### 53 **Statistical analysis**

1  
2  
3 We calculated descriptive statistics related to COVID-19 outbreaks in long-term care  
4 facilities, including the type of outbreak – whether it involved residents versus staff, length of  
5 outbreak, and descriptive summary statistics on the number of cases and deaths. We conducted  
6 bivariate analyses of facilities with and without a COVID-19 outbreak on ownership, staffing,  
7 community incidence, and facility and resident characteristics.  
8  
9

10  
11  
12  
13  
14  
15 Cox proportional hazards analyses were conducted to explore the association between  
16 ownership, staffing, community, facility and resident characteristics, and risk of a COVID-19  
17 outbreak. Facilities were deemed at risk of an outbreak throughout the duration of the study  
18 (March 1, 2020 to January 31, 2021) except when experiencing a declared outbreak. In addition  
19 to ownership, explanatory variables for the Cox proportional hazards analyses were determined  
20 by their significance in the bivariate analysis. If there were several variables in the same category  
21 of characteristics, only one significant variable was considered for the multi-variable analysis.  
22 For example, initially three staffing variables that measured care hours were reported but only  
23 the most significant one was considered in the model. The analysis utilized the time-varying  
24 variable for community incidence. The analyses included a robust sandwich estimator for the  
25 covariance matrix to account for correlation among observations between health authorities and  
26 subsequent outbreaks at the same facility. Univariate models were generated first to explore the  
27 association of explanatory variables with the risk of an outbreak. Models were then generated  
28 that included the main ownership explanatory variable while adjusting for other characteristics in  
29 distinct blocks that reflected the following categories: staffing, community, facility, and resident  
30 characteristics. All variables that were significant in their respective category model, or were  
31 determined to be an important outcome predictor a priori, were then included together in the final  
32 model. Unadjusted and adjusted hazard ratios (HR) with 95% confidence intervals (CI) are  
33  
34  
35  
36  
37  
38  
39  
40  
41  
42  
43  
44  
45  
46  
47  
48  
49  
50  
51  
52  
53  
54  
55  
56  
57  
58  
59  
60

1  
2  
3 reported for these analyses, and the proportional hazards assumptions were tested. Sensitivity  
4  
5 analyses were conducted to test the robustness of the final model results, by re-running the  
6  
7 models to exclude outlier facilities, and health authorities with proportionally fewer outbreaks.  
8  
9

10 Statistical analyses were conducted using SAS software, version 9.4 (SAS Institute Inc.,  
11  
12 Cary, NC, USA).  
13

## 14 **Ethics Approval**

15  
16  
17 Ethics approval was obtained from the University of British Columbia Behavioural  
18  
19 Research Ethics Board.  
20

## 21 **Results**

### 22 **COVID-19 outbreaks, cases, and deaths**

23  
24 From March 1, 2020 to January 31, 2021, there was 164 COVID-19 outbreaks in 112 out  
25  
26 of 293 unique facilities. Just over one fifth of the outbreaks took place in wave 1 of the pandemic  
27  
28 (March 1 to July 31, 2020) while the majority were part of the second wave (August 1, 2020 to  
29  
30 January 31, 2021). Over one half of outbreaks involved at least one resident case, and one third  
31  
32 of those outbreaks resulted in a resident death. (Table 1)  
33  
34  
35  
36  
37

### 38 **Long-term care facility characteristics**

39  
40 Among the 293 facilities included in this study, 35.6% were for-profit-owned, 28.0%  
41  
42 were non-profit, and the remainder (36.2%) were owned and operated by a health authority. The  
43  
44 mean total direct care and total nursing/care aide hours across all facilities were 3.29 and 2.98  
45  
46 hours per resident day respectively. Approximately one quarter of the facilities sub-contracted  
47  
48 out professional nursing services and a similar proportion sub-contracted non-regulated services.  
49  
50 The mean age of all facilities was 30.3 years and the mean number of beds per facility was  
51  
52  
53  
54  
55  
56  
57  
58  
59  
60

1  
2  
3 approximately 100 beds. Almost two thirds of facilities had some beds in shared occupancy  
4 rooms. Missing data for all variables was very minimal. (Table 2)  
5  
6

### 7 **Characteristics by outbreak status**

8  
9  
10 Comparisons of facilities with an outbreak versus those with no outbreak over the study  
11 period are presented. There were significant differences in ownership characteristics between the  
12 two groups. Among those facilities with an outbreak, 42.9% were for-profit, 36.6% were non-  
13 profit and 20.5% were health authority owned and operated. Facilities with outbreaks had  
14 significantly lower mean total nursing/care aide hours compared to facilities with an outbreak  
15 (2.90 versus 3.03hours). Likewise, a significantly higher proportion of facilities with an outbreak  
16 sub-contracted out professional nursing non-regulated nursing, and food services. (Table 2)  
17  
18  
19  
20  
21  
22  
23  
24  
25

26 Other characteristics that were significantly different between those with an outbreak  
27 versus those without included higher mean COVID-19 community incidence, larger facility size,  
28 and facilities with beds in shared rooms. There was no significant difference between the two  
29 groups for mean facility age or larger proportion of beds in shared rooms. (Table 2)  
30  
31  
32  
33  
34

### 35 **Associations with risk of outbreak**

36  
37  
38 In the multi-variable regression model, the following variables were associated with a  
39 higher risk of COVID-19 outbreak: for-profit and non-profit ownership compared to health  
40 authority owned and operated facilities (adjusted HR 1.50 (95% CI 1.02, 2.20) and 1.67 (95% CI  
41 1.11, 2.50) respectively), regional incidence of COVID-19 (adjusted HR 1.008 (95% CI 1.004,  
42 1.011) and higher number of beds in a facility (adjusted HR 1.14 (95% CI 1.10, 1.19) per 25  
43 beds). Higher total nursing/care aide hours per resident day was inversely but non-significantly  
44 associated with risk of outbreak (adjusted HR 0.69 (95% CI 0.33, 1.43). No violations of the  
45 proportional hazards assumptions were observed. Facilities with shared rooms were not at higher  
46  
47  
48  
49  
50  
51  
52  
53  
54  
55  
56  
57  
58  
59  
60

1  
2  
3 outbreak risk compared to those with no shared rooms. Sensitivity analyses with facility outliers  
4 removed, and data restricted to health authorities with higher community incidence of COVID-  
5  
6  
7  
8 19 did not change the results of the final model. (Table 3)  
9

## 10 **Interpretation**

### 11 **Summary of results**

12  
13  
14  
15 This study set out to assess the association of ownership and staffing characteristics with  
16  
17 COVID-19 facility outbreaks. We included 293 long-term care homes and found that ownership  
18  
19 by a health authority was protective of a COVID-19 outbreak compared to both for-profit and  
20  
21 non-profit facilities. We also found that community incidence rates and larger facilities were  
22  
23 significantly associated with outbreak risk but found no association with shared rooms or facility  
24  
25 age. Our study is part of the growing body of research examining facility characteristics and risk  
26  
27 of COVID-19 outbreak. More specifically, it adds to the US studies and scant Canadian research  
28  
29 by demonstrating that ownership status has a significant association with risk of COVID-19 even  
30  
31 after adjusting for staffing and other potential confounding factors. (13, 19)  
32  
33  
34  
35

### 36 **Explanation of findings**

37  
38 The significant protective effect of health authority ownership on outbreak occurrence  
39  
40 differs from an Ontario study that found ownership was not associated with COVID-19 outbreak  
41  
42 risk. (13) One explanation for this might be that, whereas public ownership in Ontario is through  
43  
44 municipal governments, public ownership in British Columbia is through an integrated health  
45  
46 system of health authorities delivering acute and community health services to the population in  
47  
48 their respective regions. This health system integration, by health authority owned and operated  
49  
50 long-term care facilities, may afford a number of advantages. (20) For example, research from  
51  
52 British Columbia also suggests that health authority facilities, at least earlier on in the pandemic,  
53  
54  
55  
56  
57  
58  
59  
60

1  
2  
3 had greater access to Infection Prevention and Control support, and personal protective  
4  
5 equipment (2), both of which are key strategies for outbreak prevention.  
6

7  
8 Unlike one US research study that found a protective effect of both non-profit and  
9  
10 government-owned facilities (19) on outbreak risk, our study did not see the protective effect of  
11  
12 ownership extend to non-profit ownership. Prior British Columbia research has demonstrated a  
13  
14 similarly protective effect of publicly-owned (health authority owned and operated) facilities  
15  
16 compared to both for-profit and non-profit facilities for other measures of quality including  
17  
18 higher staffing levels (5), greater access to other direct care resources (21, 22), and lower  
19  
20 emergency department (21, 22) and hospital admission rates (23). These findings are consistent  
21  
22 with the protective effect of health authority ownership on outbreak risk seen in the current  
23  
24 study.  
25  
26

27  
28 US literature similarly supports some but not all of the other findings explored by this  
29  
30 study. A number of US studies report higher staffing levels associated with lower odds of facility  
31  
32 infection. (10, 11) Our study found that higher hours of nursing/care aide hours per resident day  
33  
34 were protective in the univariate model, although this lost significance in the multi-variable  
35  
36 model. Our study found no association between facility age or shared room accommodation with  
37  
38 outbreak risk, and differs from Ontario research in this regard. (13) However, our research  
39  
40 supports the literature that the cumulative incidence of COVID-19 (13, 24), and facility size are  
41  
42 significantly associated with odds of an outbreak. (4, 11-13)  
43  
44  
45

#### 46 47 **Future directions** 48

49  
50 Future research should examine facility consistency of personal protective equipment  
51  
52 practices, the proportion of facility funding allocated to staffing, timely implementation of single  
53  
54 site orders, infection control and prevention policies, team cohesion, other measures of facility  
55  
56  
57  
58  
59  
60



1  
2  
3 leadership such as staff trust, and directors of care length of employment as potential  
4 contributors to outbreak risk. Further research from other provinces is also needed to examine  
5 the association of facility ownership and other characteristics with outbreak severity and  
6 mortality.  
7  
8  
9  
10  
11  
12

### 13 **Limitations**

14  
15 This study had several limitations. First, since British Columbia had relatively few  
16 outbreaks during the first wave of the pandemic, this may have limited the overall power of the  
17 study to detect statistically significant differences in the regression models. Second, since the  
18 study only utilized British Columbia data and definitions of outbreak can vary across studies, the  
19 generalizability of results to other provinces or jurisdictions may be limited. This study was also  
20 limited by the cross sectional survey data source utilized. Therefore, it was not able to consider  
21 additional measures outside of the survey questions, or account for other changes that occurred at  
22 facilities over the study period as a direct result of the pandemic, such as staffing levels. Third,  
23 the community incidence rates were for entire health authorities instead of more localized  
24 geographies that may better explain each facility's risk. Despite these limitations, our study is the  
25 first Canadian study to examine outbreak risk by ownership, staffing, and a number of other  
26 facility characteristics.  
27  
28  
29  
30  
31  
32  
33  
34  
35  
36  
37  
38  
39  
40  
41  
42  
43

### 44 **Conclusion**

45  
46 The study findings suggest that health authority ownership of long-term care facilities in  
47 British Columbia was protective of COVID-19 outbreaks, and that the factors behind this are  
48 likely multidimensional. Further study to unpack the influence of facility ownership and other  
49  
50  
51  
52  
53  
54  
55  
56  
57  
58  
59  
60

1  
2  
3 characteristics on COVID-19 outbreaks will help inform decisions on the development of new  
4  
5 long-term care models.  
6  
7

## 8 9 **Data sharing**

10  
11 The datasets utilized and analyzed during the current study are available from the corresponding  
12  
13 author upon reasonable request.  
14  
15  
16

## 17 18 **List of abbreviations**

19  
20 **HR** – hazard ratio

21  
22 **CI** – confidence interval

23  
24 **COVID-19** – coronavirus disease 2019

25  
26 **IQR** – interquartile range

27  
28 **SD** – standard deviation  
29  
30  
31  
32

## 33 34 **References**

- 35  
36 1. Strausbaugh LJ, Sukumar SR, Joseph CL. Infectious disease outbreaks in nursing homes: an  
37 unappreciated hazard for frail elderly persons. *Clin Infect Dis.* 2003;36(7):870-6.  
38 2. Mackenzie I. Review of COVID-19 Outbreaks in Care Homes in British Columbia. Victoria,  
39 British Columbia, Canada: Office of the Seniors Advocate British Columbia; 2021.  
40 3. The Impact of COVID-19 on Long-Term Care in Canada: Focus on the First 6 Months.  
41 Ottawa, Ontario, Canada: Canadian Institute for Health Information; 2021. p. 1-33.  
42 4. Clarke J. Impacts of the COVID-19 pandemic in nursing and residential care facilities in  
43 Canada. Canada: Statistics Canada; 2021 [Available from:  
44 <https://www150.statcan.gc.ca/n1/pub/45-28-0001/2021001/article/00025-eng.htm>.  
45  
46 5. McGregor MJ, Tate RB, McGrail KM, Cox MB, Berta W, Broemeling AM. Trends in long-  
47 term care facility staffing by facility ownership in British Columbia, 1996 to 2006. *Health*  
48 *Reports.* 2010;21(4):27-33.  
49 6. Banerjee A, McGregor M, Ponder S, Longhurst A. Long-Term Care Facility Workers'  
50 Perceptions of the Impact of Subcontracting on their Conditions of Work and the Quality of  
51 Care: A Qualitative Study in British Columbia. *Canadian Journal on Aging / La Revue*  
52 *canadienne du vieillissement.* 2021:1-9.  
53  
54  
55  
56  
57  
58  
59  
60

- 1
  - 2
  - 3
  - 4
  - 5
  - 6
  - 7
  - 8
  - 9
  - 10
  - 11
  - 12
  - 13
  - 14
  - 15
  - 16
  - 17
  - 18
  - 19
  - 20
  - 21
  - 22
  - 23
  - 24
  - 25
  - 26
  - 27
  - 28
  - 29
  - 30
  - 31
  - 32
  - 33
  - 34
  - 35
  - 36
  - 37
  - 38
  - 39
  - 40
  - 41
  - 42
  - 43
  - 44
  - 45
  - 46
  - 47
  - 48
  - 49
  - 50
  - 51
  - 52
  - 53
  - 54
  - 55
  - 56
  - 57
  - 58
  - 59
  - 60
7. Longhurst A, Ponder S, McGregor M. Labor Restructuring and Nursing Home Privatization in British Columbia, Canada. *The Privatization of Care - The Case of Nursing Homes*. US: Taylor and Francis; 2020. p. 23.
  8. Office of the Seniors Advocate British Columbia Long-Term Care Facilities Quick Facts Directory - 2020. Victoria, British Columbia, Canada2020 [Available from: <https://www.seniorsadvocatebc.ca/long-term-care-quick-facts-directory/>].
  9. Grabowski DC, Castle NG. Nursing homes with persistent high and low quality. *Medical Care Research & Review*. 2004;61(1):89-115.
  10. Li Y, Temkin-Greener H, Shan G, Cai X. COVID-19 Infections and Deaths among Connecticut Nursing Home Residents: Facility Correlates. *J Am Geriatr Soc*. 2020;68(9):1899-906.
  11. Harrington C, Ross L, Chapman S, Halifax E, Spurlock B, Bakerjian D. Nurse Staffing and Coronavirus Infections in California Nursing Homes. *Policy, politics & nursing practice*. 2020;21(3):174-86.
  12. Abrams HR, Loomer L, Gandhi A, Grabowski DC. Characteristics of U.S. Nursing Homes with COVID-19 Cases. *J Am Geriatr Soc*. 2020;68(8):1653-6.
  13. Stall NM, Jones A, Brown KA, Rochon PA, Costa AP. For-profit long-term care homes and the risk of COVID-19 outbreaks and resident deaths. *Canadian Medical Association Journal*. 2020;192(33):E946-E55.
  14. Ronald LA, McGregor MJ, Harrington C, Pollock A, Lexchin J. Observational Evidence of For-Profit Delivery and Inferior Nursing Home Care: When Is There Enough Evidence for Policy Change? *PLoS Med*. 2016;13(4):e1001995.
  15. BC Centre for Disease Control. Outbreak and Case Information: Weekly COVID-19 Outbreak Reports for Long-Term Care, Assisted Living and Independent Living. Vancouver, British Columbia, Canada: BC Ministry of Health, COVID Response and Health Emergency Management Division; 2020-2021 [Available from: <http://www.bccdc.ca/health-info/diseases-conditions/covid-19/data>].
  16. BC Centre for Disease Control. BC COVID-19 Dashboard Case Details. Vancouver, British Columbia, Canada: BC Centre for Disease Control, Provincial Health Services Authority; 2020-2021 [Available from: <http://www.bccdc.ca/health-info/diseases-conditions/covid-19/data#COVID-19Dashboard>].
  17. BC Centre for Disease Control. COVID-19 (Novel Coronavirus) Case Definitions. Vancouver, British Columbia, Canada: BC Centre for Disease Control, Provincial Health Services Authority; 2020 [Available from: [http://www.bccdc.ca/health-professionals/clinical-resources/case-definitions/COVID-19-\(novel-coronavirus\)](http://www.bccdc.ca/health-professionals/clinical-resources/case-definitions/COVID-19-(novel-coronavirus))].
  18. Statistics Canada. Table 17-10-0134-01 Estimates for population (2016 Census and administrative data) by age group and sex for July 1st, Canada, provinces, territories, health regions (2018 boundaries) and peer groups. Canada: Statistics Canada; 2021 [Available from: <https://www150.statcan.gc.ca/t1/tb11/en/tv.action?pid=1710013401>].
  19. He M, Li Y, Fang F. Is There a Link between Nursing Home Reported Quality and COVID-19 Cases? Evidence from California Skilled Nursing Facilities. *Journal of the American Medical Directors Association*. 2020;21(7):905-8.
  20. Grabowski DC, Hirth RA. Competitive spillovers across non-profit and for-profit nursing homes. *Journal of Health Economics*. 2003;22(1):1-22.

- 1
  - 2
  - 3
  - 4
  - 5
  - 6
  - 7
  - 8
  - 9
  - 10
  - 11
  - 12
  - 13
  - 14
  - 15
  - 16
  - 17
  - 18
  - 19
  - 20
  - 21
  - 22
  - 23
  - 24
  - 25
  - 26
  - 27
  - 28
  - 29
  - 30
  - 31
  - 32
  - 33
  - 34
  - 35
  - 36
  - 37
  - 38
  - 39
  - 40
  - 41
  - 42
  - 43
  - 44
  - 45
  - 46
  - 47
  - 48
  - 49
  - 50
  - 51
  - 52
  - 53
  - 54
  - 55
  - 56
  - 57
  - 58
  - 59
  - 60
21. McGregor MJ, McGrail KM, Abu-Laban RB, Ronald LA, Baumbusch J, Andrusiek D, et al. Emergency department visit rates and patterns in Canada's Vancouver Coastal Health region. *Can J Aging*. 2014;33(2):154-62.
22. McGregor MJ, Abu-Laban RB, Ronald LA, McGrail KM, Andrusiek D, Baumbusch J, et al. Nursing home characteristics associated with resident transfers to emergency departments. *Can J Aging*. 2014;33(1):38-48.
23. Poss J, McGrail K, McGregor M, Ronald L. Long-Term Care Facility Ownership and Acute Hospital Service Use in British Columbia, Canada: A Retrospective Cohort Study. *Journal of the American Medical Directors Association*. 2020.
24. Gorges RJ, Konetzka RT. Staffing Levels and COVID-19 Cases and Outbreaks in U.S. Nursing Homes. *J Am Geriatr Soc*. 2020;68(11):2462-6.

Confidential

**Table 1: Description of long-term care facility COVID-19 outbreaks declared between March 1, 2020 and January 31, 2021 in British Columbia**

| <b>COVID-19 outbreaks</b>                                           | <b>No. (%) of all COVID-19 outbreaks</b>        |
|---------------------------------------------------------------------|-------------------------------------------------|
| Total outbreaks (one or more residents or staff)                    | n=164                                           |
| Wave 1* of pandemic                                                 | 29 (17.7%)                                      |
| Wave 2* of pandemic                                                 | 135 (82.3%)                                     |
| Outbreak involving                                                  |                                                 |
| 1 or more residents                                                 | 94 (57.3%)                                      |
| 1 or more staff members only                                        | 70 (42.7%)                                      |
| At least one death                                                  | 75 (45.7%)                                      |
| Mean days of outbreak per outbreak (SD)                             | 33.8 (21.6)                                     |
| Minimum – maximum                                                   | 5.0 – 106.0                                     |
| <b>Unique long-term care facilities</b>                             | <b>No. (%) of all long-term care facilities</b> |
| Total facilities                                                    | n=293                                           |
| Unique facilities with outbreak(s)                                  | 112 (38.2%)                                     |
| No outbreak(s)                                                      | 181 (61.8%)                                     |
| 1 outbreak                                                          | 71 (24.2%)                                      |
| 2 outbreaks                                                         | 32 (10.9%)                                      |
| 3 or more outbreaks                                                 | 9 (3.1%)                                        |
| <b>COVID-19 cases</b>                                               | <b>No. (%) of COVID-19 cases</b>                |
| Total resident and staff cases                                      | n=3947                                          |
| Resident cases (resident cases/total cases)                         | 2379 (60.3%)                                    |
| Median (IQR) resident cases per facility                            | 8.0 (40.0)                                      |
| Resident deaths due to COVID-19 (resident deaths/resident cases)    | 749 (31.5%)                                     |
| <b>Community COVID-19 rates</b>                                     | <b>COVID-19 infections/ population</b>          |
| Health Authority daily incidence* (infections/1 000 000 population) |                                                 |
| Vancouver Coastal Health                                            | 41.4                                            |
| Fraser Health                                                       | 67.5                                            |
| Interior Health                                                     | 25.2                                            |
| Island Health                                                       | 7.6                                             |
| Northern Health                                                     | 42.0                                            |

SD – standard deviation; IQR – interquartile range

\*Wave 1: March 1, 2020 – July 31, 2020; Wave 2: August 1, 2020 to January 31, 2021

1  
2  
3  
4  
5  
6  
7  
8  
9  
10  
11  
12  
13  
14  
15  
16  
17  
18  
19  
20  
21  
22  
23  
24  
25  
26  
27  
28  
29  
30  
31  
32  
33  
34  
35  
36  
37  
38  
39  
40  
41  
42  
43  
44  
45  
46  
47  
48  
49  
50  
51  
52  
53  
54  
55  
56  
57  
58  
59  
60

†Average daily incidence (March 1, 2020-January 31, 2021) calculated from laboratory-diagnosed or episode-linked case tallies by health authority in British Columbia

Confidential

**Table 2. Characteristics of long-term care facilities in British Columbia by presence of a COVID-19 outbreak declared between March 1 2020 and January 31 2021**

|                                                 | No. (%) of all facilities | No. (%) of unique facilities with outbreak | No. (%) of facilities with no outbreak | p-value*        |
|-------------------------------------------------|---------------------------|--------------------------------------------|----------------------------------------|-----------------|
| Total facilities                                | n=293                     | n=112                                      | n=181                                  |                 |
| Total beds                                      | 29 095                    | 13 641                                     | 15 454                                 |                 |
| <b>Ownership characteristics</b>                |                           |                                            |                                        |                 |
| For-profit                                      | 105 (35.8%)               | 48 (42.9%)                                 | 57 (31.5%)                             | <b>&lt;.001</b> |
| Non-profit                                      | 82 (28.0%)                | 41 (36.6%)                                 | 41 (22.7%)                             | <b>&lt;.001</b> |
| Health authority owned and operated (reference) | 106 (36.2%)               | 23 (20.5%)                                 | 83 (45.9%)                             | -               |
| For-profit/non-profit (contract)                | 187 (63.8%)               | 89 (79.5%)                                 | 98 (54.1%)                             | <b>&lt;.001</b> |
| Health authority owned and operated (reference) | 106 (36.2%)               | 23 (20.5%)                                 | 83 (45.9%)                             | -               |
| For-profit chain                                | 90 (30.7%)                | 41 (36.6%)                                 | 49 (27.1%)                             | <b>&lt;.001</b> |
| For-profit non-chain                            | 15 (5.1%)                 | 7 (6.3%)                                   | 8 (4.4%)                               | <b>0.036</b>    |
| Non-profit multi-site                           | 32 (10.9%)                | 14 (12.5%)                                 | 18 (9.9%)                              | <b>0.014</b>    |
| Non-profit single site                          | 50 (17.1%)                | 27 (24.1%)                                 | 23 (12.7%)                             | <b>&lt;.001</b> |
| Health authority owned and operated (reference) | 106 (36.2%)               | 23 (20.5%)                                 | 83 (45.9%)                             | -               |
| <b>Staffing characteristics</b>                 |                           |                                            |                                        |                 |
| Mean total direct care hours (SD)               | 3.29 (0.36)               | 3.22 (0.23)                                | 3.34 (0.41)                            | <b>0.001</b>    |
| Mean total nursing/care aide hours (SD)         | 2.98 (0.35)               | 2.90 (0.19)                                | 3.03 (0.42)                            | <b>&lt;.001</b> |
| Mean total allied health hours (SD)             | 0.32 (0.10)               | 0.32 (0.07)                                | 0.32 (0.11)                            | 0.922           |
| Missing                                         | 1                         | 0                                          | 1                                      |                 |

|                                                                                                           |             |              |             |                 |
|-----------------------------------------------------------------------------------------------------------|-------------|--------------|-------------|-----------------|
| Professional nursing services sub-contracted                                                              | 69 (23.6%)  | 38 (33.9%)   | 31 (17.1%)  | <b>0.001</b>    |
| Non-regulated services (care aides) sub-contracted                                                        | 69 (23.6%)  | 36 (32.1%)   | 33 (18.2%)  | <b>0.006</b>    |
| Any food services provided by outside contractor                                                          | 109 (37.9%) | 56 (50.5%)   | 53 (29.9%)  | <b>&lt;.001</b> |
| Missing                                                                                                   | 5           | 1            | 4           |                 |
| <b>Community characteristics</b>                                                                          |             |              |             |                 |
| Mean facility weighted <sup>†</sup> COVID-19 community incidence <sup>§</sup> (infections/1 000 000) (SD) | 39.8 (22.4) | 52.3 (17.9)  | 28.8 (20.0) | <b>&lt;.001</b> |
| <b>Facility characteristics</b>                                                                           |             |              |             |                 |
| Mean age of facility (SD)                                                                                 | 30.3 (16.3) | 31.0 (17.2)  | 29.8 (15.7) | 0.549           |
| Mean beds per facility (SD)                                                                               | 99.3 (56.1) | 121.8 (59.0) | 85.4 (49.5) | <b>&lt;.001</b> |
| Facilities with beds in shared rooms                                                                      | 174 (59.4%) | 75 (67.0%)   | 99 (54.7%)  | <b>0.038</b>    |
| Large proportion of beds in shared rooms** (versus small proportion or none)                              | 88 (30.0%)  | 38 (33.9%)   | 50 (27.6%)  | 0.253           |
| <b>Resident characteristics</b>                                                                           |             |              |             |                 |
| Mean facility weighted <sup>§</sup> age of population (in years) (SD)                                     | 83.8 (3.2)  | 84.1 (2.8)   | 83.5 (3.6)  | 0.104           |
| Missing                                                                                                   | 3           | 0            | 3           |                 |
| Mean facility weighted <sup>§</sup> proportion male (SD)                                                  | 0.36 (0.10) | 0.36 (0.11)  | 0.35 (0.10) | 0.484           |
| Missing                                                                                                   | 3           | 0            | 3           |                 |
| Mean facility weighted <sup>§</sup> case mix index (SD)                                                   | 0.58 (0.04) | 0.58 (0.03)  | 0.58 (0.04) | 0.544           |
| Missing                                                                                                   | 4           | 1            | 3           |                 |

SD – standard deviation; IQR – interquartile range;  
 \*Tests of comparison include: Two independent samples t-test; Wilcoxon-Mann-Whitney test; Chi-square test.  
 †Variable is weighted by size of facility  
 §Infections per million population; Average daily incidence (March 1, 2020-January 31, 2021) calculated from laboratory-diagnosed or episode-linked case tallies by health authority in British Columbia  
 \*\*Large proportion of beds in shared rooms = greater than 20% of total beds are in shared rooms



**Table 3. Cox proportional hazards modelling, ownership and staffing characteristics associated with COVID-19 outbreaks in long-term care facilities in British Columbia, March 1 2020 to January 31 2021**

| Characteristics                                       | Univariate models (unadjusted) HR (95% CI) | Ownership model adjusted for staffing characteristics Adjusted HR (95% CI) | Ownership model adjusted for community characteristics Adjusted HR (95% CI) | Ownership model adjusted for facility characteristics Adjusted HR (95% CI) | Final Model*: Ownership model adjusted for all characteristics Adjusted HR (95% CI) |
|-------------------------------------------------------|--------------------------------------------|----------------------------------------------------------------------------|-----------------------------------------------------------------------------|----------------------------------------------------------------------------|-------------------------------------------------------------------------------------|
| <b>Main explanatory variable</b>                      |                                            |                                                                            |                                                                             |                                                                            |                                                                                     |
| For-profit                                            | <b>1.70 (1.19, 2.43)</b>                   | 1.34 (0.89, 2.00)                                                          | <b>1.69 (1.11, 2.57)</b>                                                    | <b>1.63 (1.19, 2.22)</b>                                                   | <b>1.50 (1.02, 2.20)</b>                                                            |
| Non-profit                                            | <b>2.00 (1.41, 2.85)</b>                   | <b>1.68 (1.15, 2.46)</b>                                                   | <b>2.09 (1.38, 3.16)</b>                                                    | <b>1.86 (1.37, 2.54)</b>                                                   | <b>1.67 (1.11, 2.50)</b>                                                            |
| Health authority owned and operated (reference)       |                                            |                                                                            |                                                                             |                                                                            |                                                                                     |
| <b>Staffing characteristics</b>                       |                                            |                                                                            |                                                                             |                                                                            |                                                                                     |
| Higher total nursing/care aide hours per resident day | <b>0.34 (0.16, 0.70)</b>                   | 0.55 (0.28, 1.08)                                                          |                                                                             |                                                                            | 0.69 (0.33, 1.43)                                                                   |
| Professional nursing sub-contracted                   | <b>1.36 (1.10, 1.70)</b>                   | 1.22 (0.98, 1.53)                                                          |                                                                             |                                                                            |                                                                                     |
| <b>Community characteristics</b>                      |                                            |                                                                            |                                                                             |                                                                            |                                                                                     |
| Time-varying COVID-19 incidence                       | <b>1.009 (1.006, 1.013)</b>                |                                                                            | <b>1.009 (1.006, 1.013)</b>                                                 |                                                                            | <b>1.008 (1.004, 1.011)</b>                                                         |
| <b>Facility characteristics</b>                       |                                            |                                                                            |                                                                             |                                                                            |                                                                                     |
| Higher no. of beds per facility (per 25 beds)         | <b>1.15 (1.11, 1.19)</b>                   |                                                                            |                                                                             | <b>1.13 (1.09, 1.17)</b>                                                   | <b>1.14 (1.10, 1.19)</b>                                                            |
| Facilities with beds in shared rooms versus none      | 1.27 (0.98, 1.64)                          |                                                                            |                                                                             | 1.18 (0.93, 1.49)                                                          |                                                                                     |

HR – hazard ratio; CI – confidence interval

\*Model was initially adjusted for case mix index; however, it was non significant and did not change the results, and therefore was removed from the final model.
